# Supplementary material for: Site directed maleimide bifunctional chelators for the M(CO)3+ core (M =99mTc, Re)
Source: Royal Society of Chemistry journal article supplement (doi:10.1039/b417588c), 2005-01-01
Supplement: b417588c.pdf [file b417588c.pdf]

# Supplementary Material (ESI) for Chemical Communications  
# This journal is © The Royal Society of Chemistry 2005

- A. Labeling of L1-L4 with  $^{99m}\text{Tc}(\text{CO})_3^+$ .**
- B. Absorption and Fluorescence Studies.**
- C. X-ray Structure of L2.**

**A. Labeling of L1-L4 with  $^{99m}\text{Tc}(\text{CO})_3^+$ .** Labeling was accomplished in two steps using the readily prepared IsoLink<sup>TM</sup> kits (Mallinckrodt) to generate the  $[\text{}^{99m}\text{Tc}(\text{CO})_3(\text{H}_2\text{O})_3]^+$  precursor (100 $\mu\text{l}$ ), which was introduced to a methanol solution (0.5 mL) of the appropriate ligand (0.25 mg). The sealed vial was heated at 90° C for 20 minutes. After cooling, the reaction was checked for purity via HPLC using a Vydac C18 column (4.6mm x 25cm x 5 $\mu\text{m}$ ) and methanol as eluant. The purity, analyzed using C18 HPLC, was >95% radiochemical purity. The labeling yields were all > 85%, and achievable at levels as low as 1  $\mu\text{g}$  / ml.

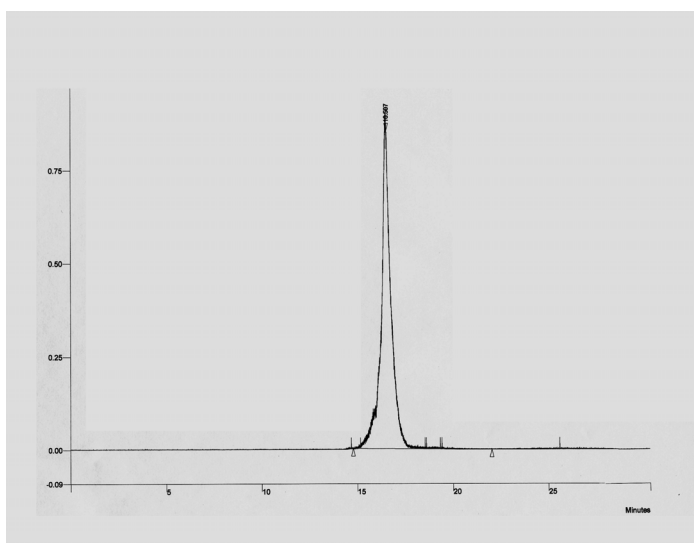

**Figure S1.** Radiochromatogram of the crude reaction product,  $[\text{}^{99m}\text{Tc}(\text{CO})_3\text{L3}]^+$ .

## **B. Absorption and Fluorescence Studies**

### *Absorbance Spectra and Extinction Coefficient*

All absorbance measurements were taken using a Varian model CARY -50 Bio UV-Visible spectrophotometer. **Figure 3** shows the absorption spectrum of  $[\text{Re}(\text{CO})_3\text{L4}]\text{Br}$  in ethylene glycol. Absorption maxima are seen near 321 and 414 nm. The extinction coefficients at 321 and 414 nm are 17729 and 1215  $\text{mol}^{-1} \text{cm}^{-1}$  respectively.

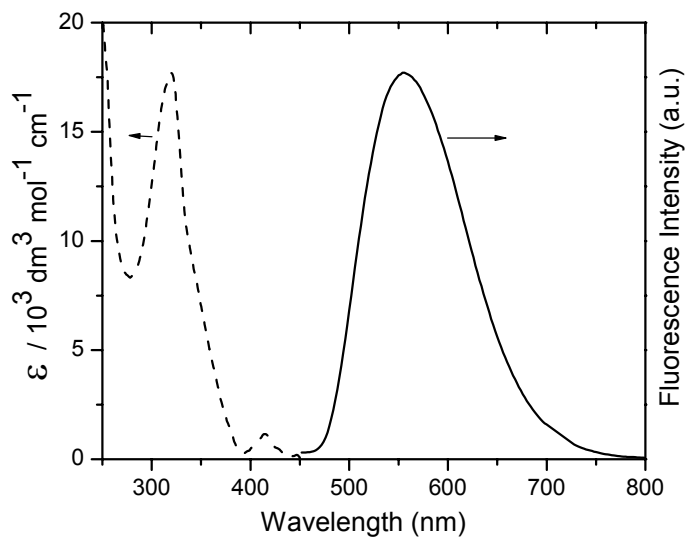

**Figure S2:** Absorbance spectra of  $[\text{Re}(\text{CO})_3\text{L4}]\text{Br}$  in ethylene glycol at room temperature.

#### *Fluorescence Spectroscopy*

Steady state fluorescence measurements were recorded with a PTI fluorimeter. Emission was monitored from 400 to 800 nm with an excitation wavelength of 321 nm in 1 nm increments with an integration time of 0.5 sec. Samples of  $[\text{Re}(\text{CO})_3\text{L4}]\text{Br}$  were prepared in ethylene glycol ( $1 \times 10^{-5} \text{ M}$ ).

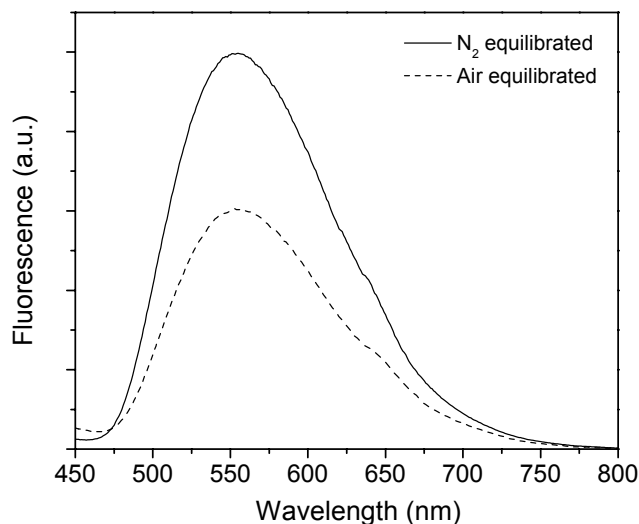

**Figure S3:** Emission spectra of  $[\text{Re}(\text{CO})_3\text{L4}]\text{Br}$  in either air equilibrated or nitrogen equilibrated ethylene glycol.

Emission spectrum of the rhenium probe shows a maximum at 555 nm. As shown in **Figure 4** the equilibration of the samples with a nitrogen gas atmosphere drastically increases the quantum yield of the rhenium probe. Using a standard reference material, in this case ruthenium bipyridine, a quantitative value of quantum yield can be calculated by using the following equation where  $Q$  and  $Q_R$  are the quantum yields,  $I$  and  $I_R$  are the integrated emission intensities,  $OD$  and  $OD_R$  are the optical densities, and  $n$  and  $n_R$  are the refractive indexes of the solvents of the unknown and reference materials (subscript R indicating reference).

$$Q = Q_R \frac{I}{I_R} \frac{OD_R}{OD} \frac{n^2}{n_R^2}$$

**Table 1** gives the values measured and resulting quantum yields for  $[\text{Re}(\text{CO})_3\text{L4}]\text{Br}$

**Table 1:** Quantum Yield Data

|                                 | Rhenium in Ethylene Glycol (Air Equil.) | Rhenium in Ethylene Glycol ( $\text{N}_2$ Equil.) |
|---------------------------------|-----------------------------------------|---------------------------------------------------|
| Emission Intensity <sup>‡</sup> | $1.99 \times 10^8$                      | $3.23 \times 10^8$                                |

# Supplementary Material (ESI) for Chemical Communications  
# This journal is © The Royal Society of Chemistry 2005

|                  |        |       |
|------------------|--------|-------|
| Refractive index | 1.43   | 1.43  |
| Quantum Yield    | 0.0091 | 0.015 |

<sup>‡</sup>Emission was measured between 400 and 800 nm with an excitation of 321 nm in 1 nm increments with an integration time of 0.5 sec. Excitation bandpass was 1 nm and emission bandpass was 2 nm.

Time resolved fluorescence decays were recorded using a PTI fluorimeter. The 321 nm output of the flash lamp was the excitation wavelength for emission lifetime measurements. The emission of the  $[\text{Re}(\text{CO})_3\text{L4}]\text{Br}$  was monitored at 555 nm. The fluorescence intensity decay was fit to a single exponential function:  $I = \alpha \exp(-t/\tau)$ , where  $\tau$  is the fluorescence lifetime and  $\alpha$  is the preexponential factor. In ethylene glycol under nitrogen atmosphere the fluorescence lifetime of  $[\text{Re}(\text{CO})_3\text{L4}]\text{Br}$  was measured to be 16.7  $\mu\text{sec}$ .

### C. X-ray Structure of L2.

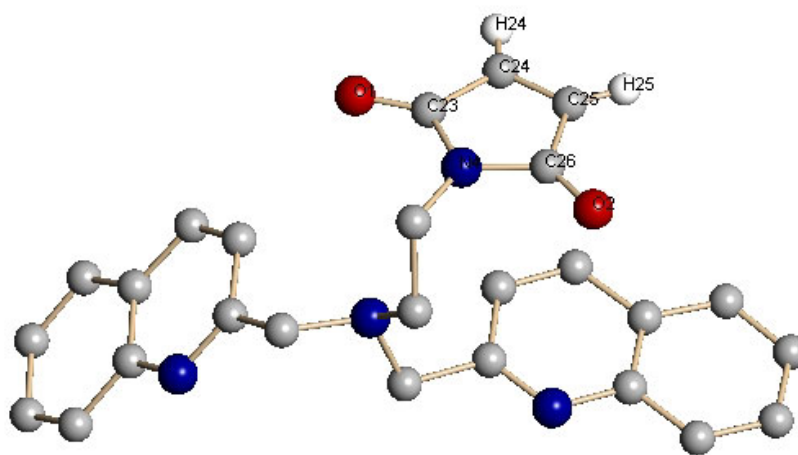

**Figure S4.** The structure of L2.
